# Supplementary material
Source: PubMed Central journal article supplement (PMC7911856)
Supplement: NIHMS1656471-supplement-Supplemental_Publication_Material.pdf [file NIHMS1656471-supplement-Supplemental_Publication_Material.pdf]

## **SUPPLEMENTAL MATERIAL**

**Honigberg MC, Zekavat SM, Niroula A, et al. Premature Menopause, Clonal Hematopoiesis, and Coronary Artery Disease in Postmenopausal Women.**

**Supplemental Figure I. Prevalence of CHIP by age at menopause in the UK Biobank and Women's Health Initiative.**

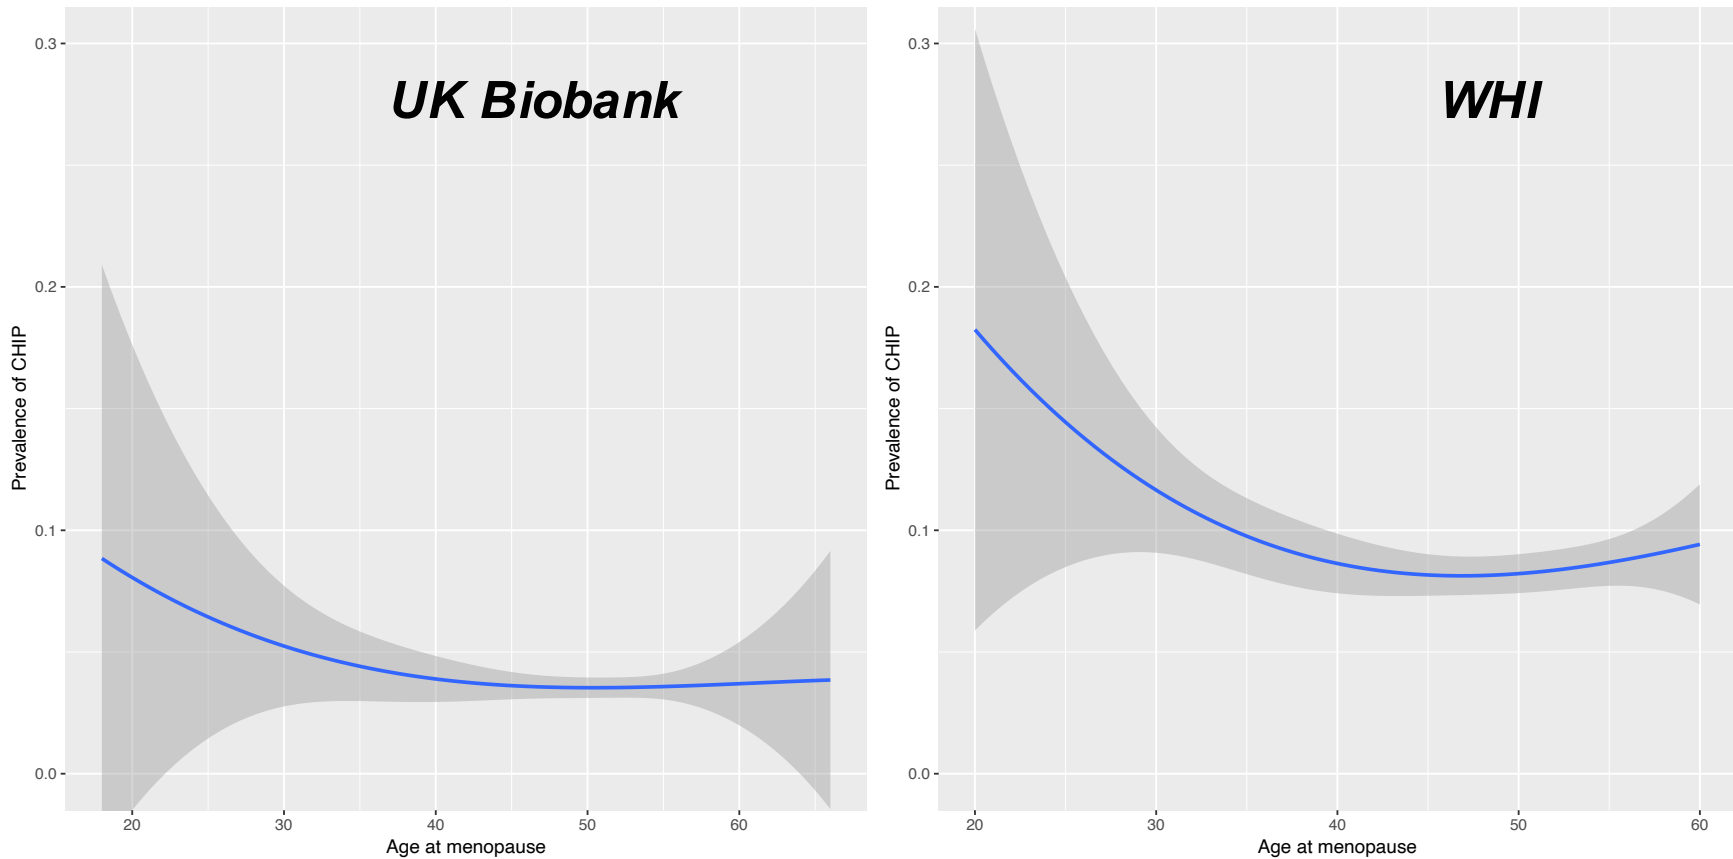

CHIP prevalence increased with progressively younger age at menopause. Plots were generated with the 'ggplot2' package in R using a cubic spline with 3 knots. The shaded band represents the modeled 95% confidence band. CHIP = clonal hematopoiesis of indeterminate potential; WHI = Women's Health Initiative.

**Supplemental Figure II. Prevalence of CHIP in women with vs. without premature menopause by variant allele frequency.**

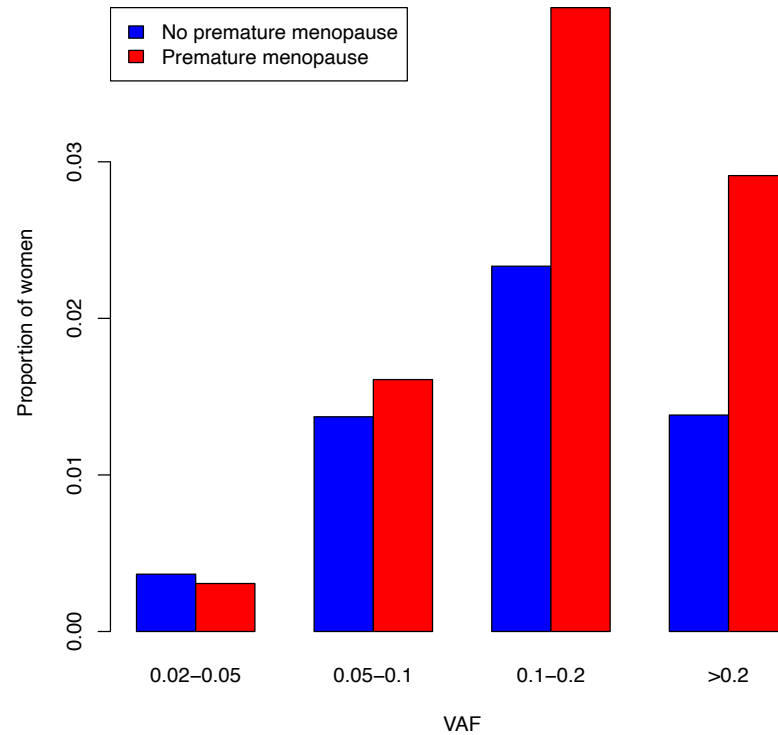

Prevalence of CHIP in the pooled cohort of the UK Biobank and Women's Health Initiative (total N=19,606) grouped by CHIP VAF. Differences in CHIP prevalence between women with (n=1,305) vs. without (n=18,301) premature menopause were more pronounced for CHIP with VAF >0.1. CHIP = clonal hematopoiesis of indeterminate potential; VAF = variant allele frequency.

Supplemental Figure III. Mutational signatures observed in UK Biobank subjects with CHIP by premature menopause status.

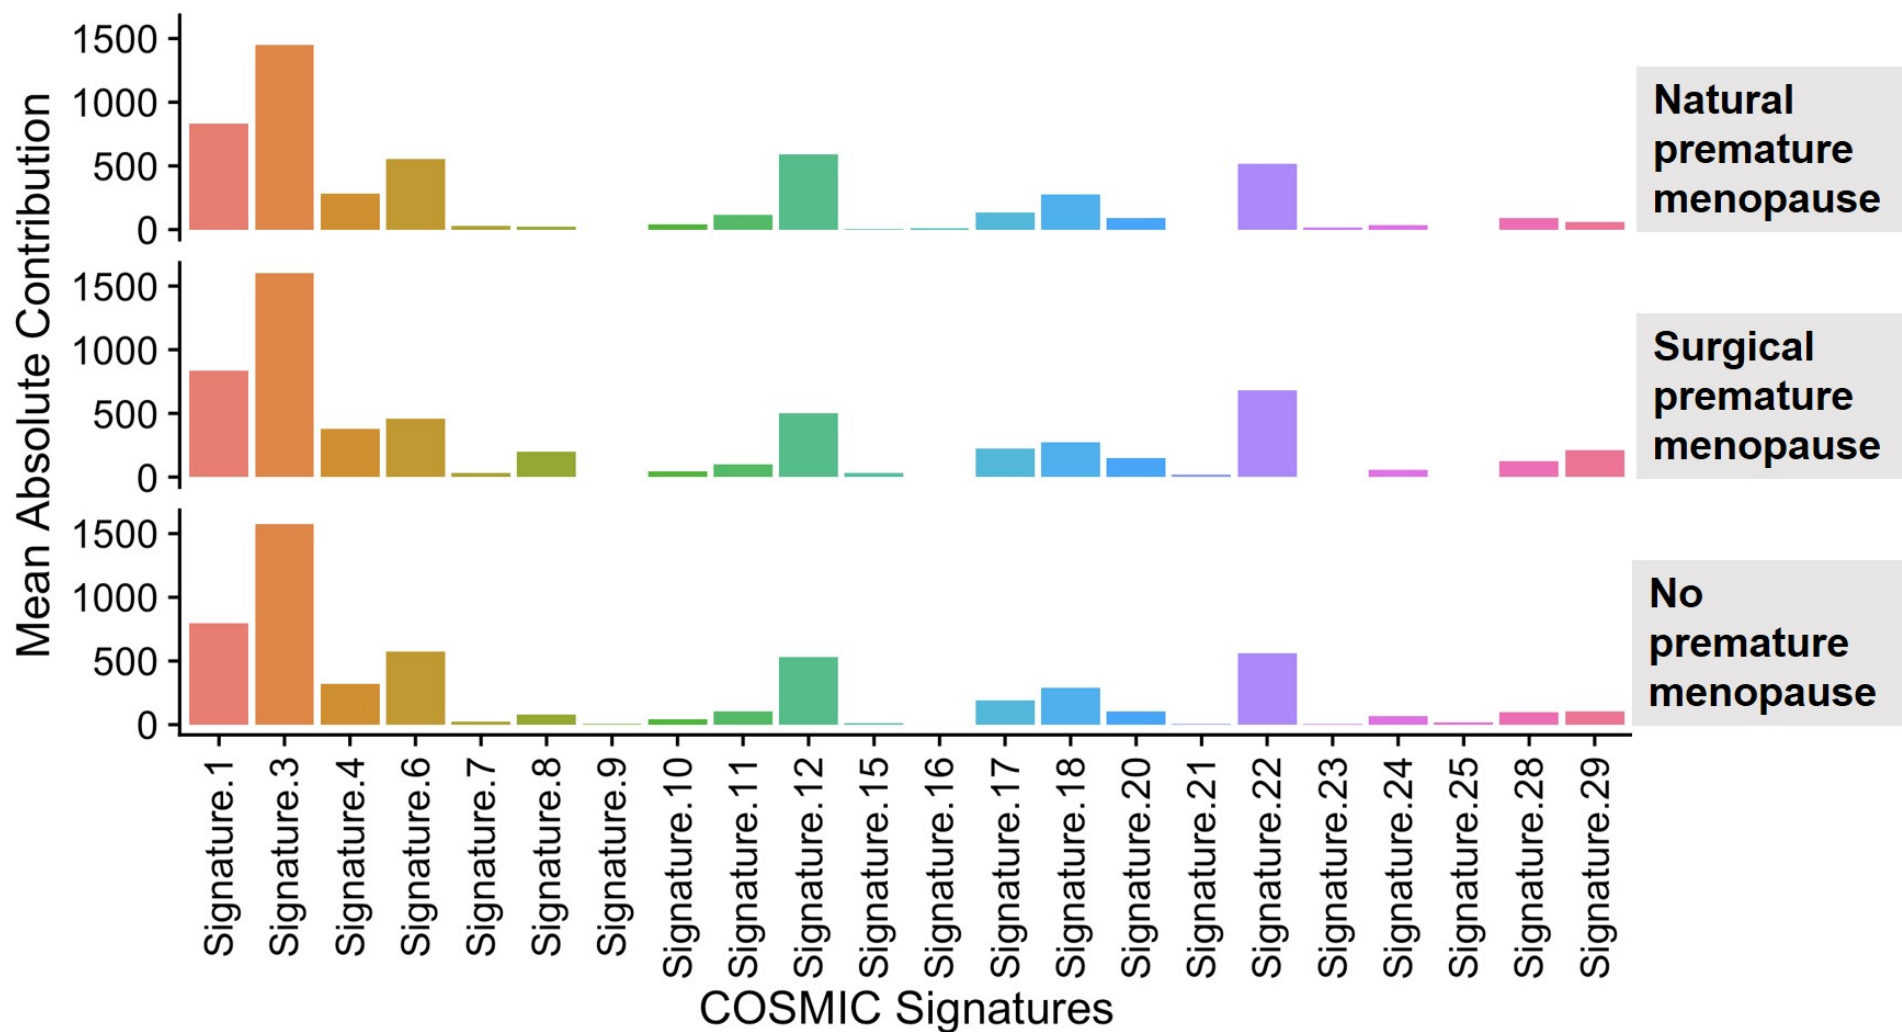

**Supplemental Table IV. Cumulative incidence of coronary artery disease events by variant allele frequency.**

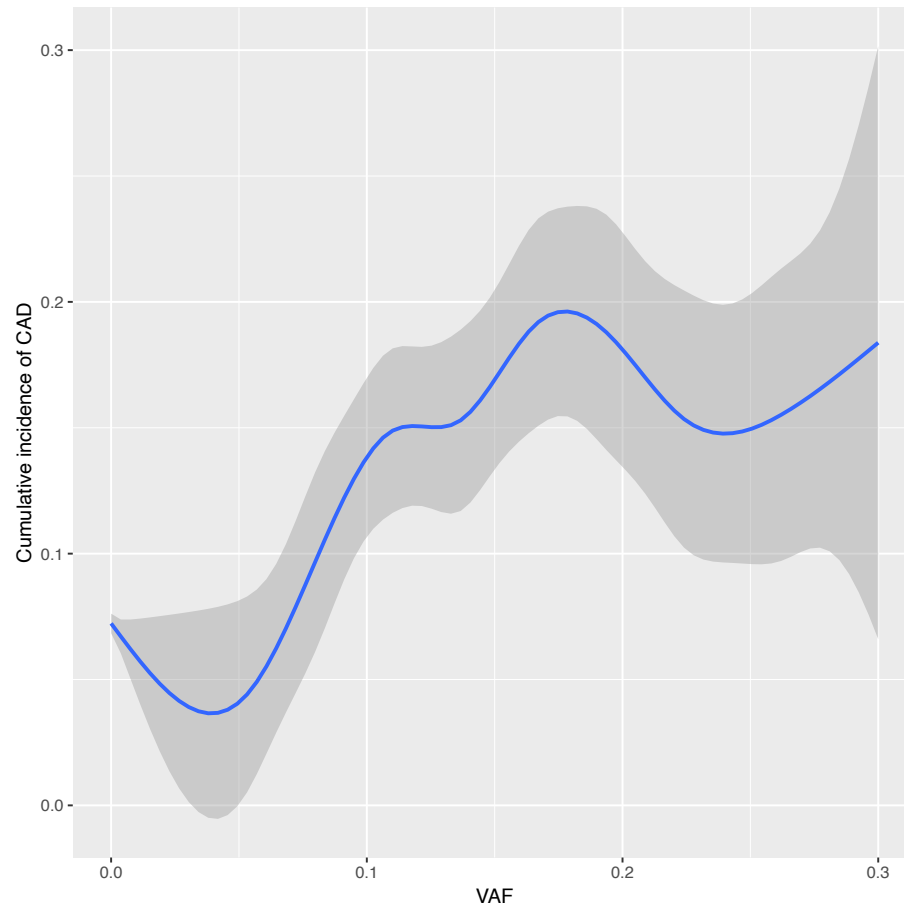

Cumulative incidence of coronary artery disease by VAF among individuals in the pooled cohort of the UK Biobank and Women's Health Initiative with CHIP (N=18,451 without prevalent coronary artery disease). Data are fit using the generalized additive model in the 'ggplot2' package in R version 3.6.0. The shaded band represents the modeled 95% confidence band. CHIP = clonal hematopoiesis of indeterminate potential; CAD = coronary artery disease; VAF = variant allele frequency.

**Supplemental Table I. CHIP variants queried in the UK Biobank.**

| <b>Gene name</b> | <b>Accession</b> | <b>Reported mutations used for variant calling</b>                                                                                                                                                                                                                                                                                                                                                                                                                                                                                                                                                                                                                                                                                                                                                                                                                                                                                                                                                                                                                                                                                                                                                                                                                                                                                                                                                                                                                                                                                                                                                                                                                                                                                        |
|------------------|------------------|-------------------------------------------------------------------------------------------------------------------------------------------------------------------------------------------------------------------------------------------------------------------------------------------------------------------------------------------------------------------------------------------------------------------------------------------------------------------------------------------------------------------------------------------------------------------------------------------------------------------------------------------------------------------------------------------------------------------------------------------------------------------------------------------------------------------------------------------------------------------------------------------------------------------------------------------------------------------------------------------------------------------------------------------------------------------------------------------------------------------------------------------------------------------------------------------------------------------------------------------------------------------------------------------------------------------------------------------------------------------------------------------------------------------------------------------------------------------------------------------------------------------------------------------------------------------------------------------------------------------------------------------------------------------------------------------------------------------------------------------|
| <i>DNMT3A</i>    | NM_022552        | Frameshift/nonsense/splice-site, F290I, F290C, V296M, P307S, P307R, R326H, R326L, R326C, R326S, G332R, G332E, V339A, V339M, V339G, L344Q, L344P, R366P, R366H, R366G, A368T, A368V, R379H, R379C, I407T, I407N, I407S, F414L, F414S, F414C, A462V, K468R, C497G, C497Y, Q527H, Q527P, Y533C, S535F, C537G, C537R, G543A, G543S, G543C, L547H, L547P, L547F, M548I, M548K, G550R, W581R, W581G, W581C, R604Q, R604W, R635W, R635Q, S638F, G646V, G646E, L653W, L653F, I655N, V657A, V657M, R659H, Y660C, V665G, V665L, M674V, R676W, R676Q, G685R, G685E, G685A, D686Y, D686G, R688H, G699R, G699S, G699D, P700L, P700S, P700R, P700Q, P700T, P700A, D702N, D702Y, V704M, V704G, I705F, I705T, I705S, I705N, G707D, G707V, C710S, C710Y, S714C, V716D, V716F, V716I, N717S, N717I, P718L, R720H, R720G, K721R, K721T, Y724C, R729Q, R729W, R729G, F731C, F731L, F731Y, F731I, F732del, F732C, F732S, F732L, E733G, E733A, F734L, F734C, Y735C, Y735N, Y735S, R736H, R736C, R736P, L737H, L737V, L737F, L737R, A741V, P742P, P743R, P743L, R749C, R749L, R749H, R749G, F751L, F751C, F752del, F752C, F752L, F752I, F752V, W753G, W753C, W753R, L754P, L754R, L754H, F755S, F755I, F755L, M761I, M761V, G762C, V763I, S770L, S770W, S770P, R771Q, F772I, F772V, L773R, L773V, E774K, E774D, E774G, I780T, D781G, R792H, W795C, W795L, G796D, G796V, N797Y, N797H, N797S, P799S, P799R, P799H, R803S, R803W, P804L, P804S, K826R, S828N, K829R, T835M, N838D, K841Q, Q842E, P849L, D857N, W860R, E863D, F868S, G869S, G869V, M880V, S881R, S881I, R882H, R882P, R882C, R882G, A884P, A884V, Q886R, L889P, L889R, G890D, G890R, G890S, V895M, P896L, V897G, V897D, R899L, R899H, R899C, L901R, L901H, P904L, F909C, P904Q, A910P, C911R, C911Y |
| <i>TET2</i>      | NM_001127208     | Frameshift/nonsense/splice-site, missense mutations in catalytic domains (p.1104-1481 and 1843-2002)                                                                                                                                                                                                                                                                                                                                                                                                                                                                                                                                                                                                                                                                                                                                                                                                                                                                                                                                                                                                                                                                                                                                                                                                                                                                                                                                                                                                                                                                                                                                                                                                                                      |

**Supplemental Table II. CHIP variants queried in the Women's Health Initiative.**

| <b>Gene name</b> | <b>Accession</b> | <b>Reported mutations used for variant calling</b>                                                                                                                                                                                                                                                                                                                                                                                                                                                                                                                                                                                                                                                                                                                                                                                                                                                                                                                                                                                                                                                                                                                                                                                                                                                                                                                                                                     |
|------------------|------------------|------------------------------------------------------------------------------------------------------------------------------------------------------------------------------------------------------------------------------------------------------------------------------------------------------------------------------------------------------------------------------------------------------------------------------------------------------------------------------------------------------------------------------------------------------------------------------------------------------------------------------------------------------------------------------------------------------------------------------------------------------------------------------------------------------------------------------------------------------------------------------------------------------------------------------------------------------------------------------------------------------------------------------------------------------------------------------------------------------------------------------------------------------------------------------------------------------------------------------------------------------------------------------------------------------------------------------------------------------------------------------------------------------------------------|
| <i>ASXL1</i>     | NM_015338        | Frameshift/nonsense/splice-site in exon 11-12                                                                                                                                                                                                                                                                                                                                                                                                                                                                                                                                                                                                                                                                                                                                                                                                                                                                                                                                                                                                                                                                                                                                                                                                                                                                                                                                                                          |
| <i>ASXL2</i>     | NM_018263        | Frameshift/nonsense/splice-site in exon 11-12                                                                                                                                                                                                                                                                                                                                                                                                                                                                                                                                                                                                                                                                                                                                                                                                                                                                                                                                                                                                                                                                                                                                                                                                                                                                                                                                                                          |
| <i>BCOR</i>      | NM_001123385     | Frameshift/nonsense/splice-site                                                                                                                                                                                                                                                                                                                                                                                                                                                                                                                                                                                                                                                                                                                                                                                                                                                                                                                                                                                                                                                                                                                                                                                                                                                                                                                                                                                        |
| <i>BCORL1</i>    | NM_021946        | Frameshift/nonsense/splice-site                                                                                                                                                                                                                                                                                                                                                                                                                                                                                                                                                                                                                                                                                                                                                                                                                                                                                                                                                                                                                                                                                                                                                                                                                                                                                                                                                                                        |
| <i>BRAF</i>      | NM_004333        | G464E, G464V, G466E, G466V, G469R, G469E, G469A, G469V, V471F, V472S, L485W, N581S, I582M, I592M, I592V, D594N, D594G, D594V, D594E, F595L, F595S, G596R, L597V, L597S, L597Q, L597R, A598V, V600M, V600L, V600K, V600R, V600E, V600A, V600G, V600D, K601E, K601N, R603*, W604R, W604G, S605G, S605F, S605N, G606E, G606A, G606V, H608R, H608L, G615R, S616P, S616F, L618S, L618W                                                                                                                                                                                                                                                                                                                                                                                                                                                                                                                                                                                                                                                                                                                                                                                                                                                                                                                                                                                                                                      |
| <i>BRCC3</i>     | NM_024332        | Frameshift/nonsense/splice-site                                                                                                                                                                                                                                                                                                                                                                                                                                                                                                                                                                                                                                                                                                                                                                                                                                                                                                                                                                                                                                                                                                                                                                                                                                                                                                                                                                                        |
| <i>CBL</i>       | NM_005188        | RING finger missense p.381-421                                                                                                                                                                                                                                                                                                                                                                                                                                                                                                                                                                                                                                                                                                                                                                                                                                                                                                                                                                                                                                                                                                                                                                                                                                                                                                                                                                                         |
| <i>CBLB</i>      | NM_170662        | RING finger missense p.372-412                                                                                                                                                                                                                                                                                                                                                                                                                                                                                                                                                                                                                                                                                                                                                                                                                                                                                                                                                                                                                                                                                                                                                                                                                                                                                                                                                                                         |
| <i>CEBPA</i>     | NM_004364        | Frameshift/nonsense/splice-site                                                                                                                                                                                                                                                                                                                                                                                                                                                                                                                                                                                                                                                                                                                                                                                                                                                                                                                                                                                                                                                                                                                                                                                                                                                                                                                                                                                        |
| <i>CREBBP</i>    | NM_004380        | Frameshift/nonsense/splice-site, D1435E, R1446L, R1446H, R1446C, Y1450C, P1476R, Y1482H, H1487Y, W1502C, Y1503D, Y1503H, Y1503F, S1680del                                                                                                                                                                                                                                                                                                                                                                                                                                                                                                                                                                                                                                                                                                                                                                                                                                                                                                                                                                                                                                                                                                                                                                                                                                                                              |
| <i>CSF1R</i>     | NM_005211        | L301F, L301S, Y969C, Y969N, Y969F, Y969H, Y969D                                                                                                                                                                                                                                                                                                                                                                                                                                                                                                                                                                                                                                                                                                                                                                                                                                                                                                                                                                                                                                                                                                                                                                                                                                                                                                                                                                        |
| <i>CSF3R</i>     | NM_000760        | T615A, T618I, truncating c.741-791                                                                                                                                                                                                                                                                                                                                                                                                                                                                                                                                                                                                                                                                                                                                                                                                                                                                                                                                                                                                                                                                                                                                                                                                                                                                                                                                                                                     |
| <i>CTCF</i>      | NM_006565        | Frameshift/nonsense, R377C, R377H, P378A, P378L                                                                                                                                                                                                                                                                                                                                                                                                                                                                                                                                                                                                                                                                                                                                                                                                                                                                                                                                                                                                                                                                                                                                                                                                                                                                                                                                                                        |
| <i>CUX1</i>      | NM_181552        | Frameshift/nonsense                                                                                                                                                                                                                                                                                                                                                                                                                                                                                                                                                                                                                                                                                                                                                                                                                                                                                                                                                                                                                                                                                                                                                                                                                                                                                                                                                                                                    |
| <i>DNMT3A</i>    | NM_022552        | Frameshift/nonsense/splice-site, F290I, F290C, V296M, P307S, P307R, R326H, R326L, R326C, R326S, G332R, G332E, V339A, V339M, V339G, L344Q, L344P, R366P, R366H, R366G, A368T, A368V, R379H, R379C, I407T, I407N, I407S, F414L, F414S, F414C, A462V, K468R, C497G, C497Y, Q527H, Q527P, Y533C, S535F, C537G, C537R, G543A, G543S, G543C, L547H, L547P, L547F, M548I, M548K, G550R, W581R, W581G, W581C, R604Q, R604W, R635W, R635Q, S638F, G646V, G646E, L653W, L653F, I655N, V657A, V657M, R659H, Y660C, V665G, V665L, M674V, R676W, R676Q, G685R, G685E, G685A, D686Y, D686G, R688H, G699R, G699S, G699D, P700L, P700S, P700R, P700Q, P700T, P700A, D702N, D702Y, V704M, V704G, I705F, I705T, I705S, I705N, G707D, G707V, C710S, C710Y, S714C, V716D, V716F, V716I, N717S, N717I, P718L, R720H, R720G, K721R, K721T, Y724C, R729Q, R729W, R729G, F731C, F731L, F731Y, F731I, F732del, F732C, F732S, F732L, E733G, E733A, F734L, F734C, Y735C, Y735N, Y735S, R736H, R736C, R736P, L737H, L737V, L737F, L737R, A741V, P742P, P743R, P743L, R749C, R749L, R749H, R749G, F751L, F751C, F752del, F752C, F752L, F752I, F752V, W753G, W753C, W753R, L754P, L754R, L754H, F755S, F755I, F755L, M761I, M761V, G762C, V763I, S770L, S770W, S770P, R771Q, F772I, F772V, L773R, L773V, E774K, E774D, E774G, I780T, D781G, R792H, W795C, W795L, G796D, G796V, N797Y, N797H, N797S, P799S, P799R, P799H, R803S, R803W, P804L, P804S, |

|              |              |                                                                                                                                                                                                                                                                                                                                      |
|--------------|--------------|--------------------------------------------------------------------------------------------------------------------------------------------------------------------------------------------------------------------------------------------------------------------------------------------------------------------------------------|
|              |              | K826R, S828N, K829R, T835M, N838D, K841Q, Q842E, P849L, D857N, W860R, E863D, F868S, G869S, G869V, M880V, S881R, S881I, R882H, R882P, R882C, R882G, A884P, A884V, Q886R, L889P, L889R, G890D, G890R, G890S, V895M, P896L, V897G, V897D, R899L, R899H, R899C, L901R, L901H, P904L, F909C, P904Q, A910P, C911R, C911Y                   |
| <i>EED</i>   | NM_003797    | Frameshift/nonsense/splice-site, L240Q, I363M                                                                                                                                                                                                                                                                                        |
| <i>EP300</i> | NM_001429    | Frameshift/nonsense/splice-site, VF1148_1149del, D1399N, D1399Y, P1452L, Y1467N, Y1467H, Y1467C, R1627W, A1629V                                                                                                                                                                                                                      |
| <i>ETNK1</i> | NM_018638    | N244S, N244T, N244K                                                                                                                                                                                                                                                                                                                  |
| <i>ETV6</i>  | NM_001987    | Frameshift/nonsense/splice-site                                                                                                                                                                                                                                                                                                      |
| <i>EZH2</i>  | NM_001203247 | Frameshift/nonsense/splice-site, Q62R, N102S, F145S, F145C, F145Y, F145L, G159R, E164D, R202Q, K238E, E244K, R283Q, H292R, P488S, R497Q, R561H, T568I, K629E, Y641N, Y641H, Y641S, Y641C, Y641F, D659Y, D659G, V674M, A677G, A677V, R679C, R679H, R685C, R685H, A687V, N688I, N688K, H689Y, S690P, I708V, I708T, I708M, E720K, E740K |
| <i>FLT3</i>  | NM_004119    | V579A, V592A, V592I, F594L, FY590-591GD, D835Y, D835H, D835E, del835                                                                                                                                                                                                                                                                 |
| <i>GATA1</i> | NM_002049    | Frameshift/nonsense/splice-site                                                                                                                                                                                                                                                                                                      |
| <i>GATA2</i> | NM_001145661 | Frameshift/nonsense/splice-site, R293Q, N317H, A318T, A318V, A318G, G320D, L321P, L321F, L321V, Q328P, R330Q, R361L, L359V, A372T, R384G, R384K                                                                                                                                                                                      |
| <i>GATA3</i> | NM_001002295 | Frameshift/nonsense/splice-site ZNF domain, R276W, R276Q, N286T, L348V,                                                                                                                                                                                                                                                              |
| <i>GNA13</i> | NM_006572    | I34T, G57S, S62F, M68K, Q134R, Y145F, L152F, E167D, Q169H, R264H, E273K, V322G, V362G, L371F                                                                                                                                                                                                                                         |
| <i>GNAS</i>  | NM_000516    | R201(844)S, R201(844)C, R201(844)H, R201(844)L, Q227(870)K, Q227(870)R, Q227(870)L, Q227(870)H, R374(1017)C                                                                                                                                                                                                                          |
| <i>GNB1</i>  | NM_002074    | K57N, K57M, K57E, K57T, I80T, I80N                                                                                                                                                                                                                                                                                                   |
| <i>IDH1</i>  | NM_005896    | R132C, R132G, R132H, R132L, R132P, R132V, V178I                                                                                                                                                                                                                                                                                      |
| <i>IDH2</i>  | NM_002168    | R140W, R140Q, R140L, R140G, R172W, R172G, R172K, R172T, R172M, R172N, R172S                                                                                                                                                                                                                                                          |
| <i>IKZF1</i> | NM_006060    | Frameshift/nonsense                                                                                                                                                                                                                                                                                                                  |
| <i>IKZF2</i> | NM_016260    | Frameshift/nonsense                                                                                                                                                                                                                                                                                                                  |
| <i>IKZF3</i> | NM_012481    | Frameshift/nonsense                                                                                                                                                                                                                                                                                                                  |
| <i>JAK1</i>  | NM_002227    | T478A, T478S, V623A, A634D, L653F, R724H, R724Q, R724P, T782M, L783F                                                                                                                                                                                                                                                                 |
| <i>JAK2</i>  | NM_004972    | N533D, N533Y, N533S, H538R, K539E, K539L, I540T, I540V, V617F, R683S, R683G, del/ins537-539L, del/ins538-539L, del/ins540-543MK, del/ins540-544MK, del/ins541-543K, del542-543, del543-544, ins11546-547                                                                                                                             |
| <i>JAK3</i>  | NM_000215    | M511T, M511I, A572V, A572T, A573V, R657Q, V715I, V715A                                                                                                                                                                                                                                                                               |
| <i>KDM6A</i> | NM_021140    | Frameshift/nonsense/splice-site, del419                                                                                                                                                                                                                                                                                              |
| <i>KIT</i>   | NM_000222    | ins503, V559A, V559D, V559G, V559I, V560D, V560A, V560G, V560E, del560, E561K, del579, P627L, P627T, R634W, K642E, K642Q, V654A, V654E, H697Y, H697D, E761D, K807R, D816H, D816Y, D816F, D816I, D816V, D816H, del551-559                                                                                                             |



|                |              |                                                                                                                                                                                                                                                                                                                                                                                                                                                   |
|----------------|--------------|---------------------------------------------------------------------------------------------------------------------------------------------------------------------------------------------------------------------------------------------------------------------------------------------------------------------------------------------------------------------------------------------------------------------------------------------------|
| <i>KRAS</i>    | NM_033360    | G12D, G12A, G12E, G12V, G13D, G13C, G13Y, G13F, G13R, G13A, G13V, G13E, V14I, T58I, G60D, G60A, G60V, Q61K, Q61E, Q61P, Q61R, Q61L, Q61H, K117E, K117N, A146T, A146P, A146V                                                                                                                                                                                                                                                                       |
| <i>LUC7L2</i>  | NM_016019    | Frameshift/nonsense/splice-site                                                                                                                                                                                                                                                                                                                                                                                                                   |
| <i>MLL</i>     | NM_005933    | Frameshift/nonsense                                                                                                                                                                                                                                                                                                                                                                                                                               |
| <i>MLL2</i>    | NM_003482    | Frameshift/nonsense                                                                                                                                                                                                                                                                                                                                                                                                                               |
| <i>MPL</i>     | NM_005373    | S505G, S505N, S505C, L510P, del513, W515A, W515R, W515K, W515S, W515L, A519T, A519V, Y591D, W515-518KT                                                                                                                                                                                                                                                                                                                                            |
| <i>NF1</i>     | NM_000267    | Frameshift/nonsense                                                                                                                                                                                                                                                                                                                                                                                                                               |
| <i>NPM1</i>    | NM_002520    | Frameshift p.W288fs (insertion at c.859_860, 860_861, 862_863, 863_864)                                                                                                                                                                                                                                                                                                                                                                           |
| <i>NRAS</i>    | NM_002524    | G12S, G12R, G12C, G12N, G12P, G12Y, G12D, G12A, G12V, G12E, G13S, G13R, G13C, G13N, G13P, G13Y, G13D, G13A, G13V, G13E, G60E, G60R, Q61R, Q61L, Q61K, Q61P, Q61H, Q61Q                                                                                                                                                                                                                                                                            |
| <i>PDS5B</i>   | NM_015032    | Frameshift/nonsense/splice-site, R1292Q                                                                                                                                                                                                                                                                                                                                                                                                           |
| <i>PDSS2</i>   | NM_020381    | Frameshift/nonsense                                                                                                                                                                                                                                                                                                                                                                                                                               |
| <i>PHF6</i>    | NM_001015877 | Frameshift/nonsense/splice-site, A40D, M125I, S246Y, F263L, R274Q, C297Y, H302Y, H329L                                                                                                                                                                                                                                                                                                                                                            |
| <i>PHIP</i>    | NM_017934    | Frameshift/nonsense/splice-site                                                                                                                                                                                                                                                                                                                                                                                                                   |
| <i>PPM1D</i>   | NM_003620    | Frameshift/nonsense, exon 5 or 6                                                                                                                                                                                                                                                                                                                                                                                                                  |
| <i>PRPF40B</i> | NM_001031698 | Frameshift/nonsense/splice-site, P15H, M58I, P405L, P562S,                                                                                                                                                                                                                                                                                                                                                                                        |
| <i>PRPF8</i>   | NM_006445    | M1307I, C1594W, D1598Y, D1598N, D1598V (ADD MORE VARS)                                                                                                                                                                                                                                                                                                                                                                                            |
| <i>PTEN</i>    | NM_000314    | Frameshift/nonsense/splice-site, D24G, R47G, F56V, L57W, H61R, K66N, Y68H, C71Y, F81C, Y88C, D92G, D92V, D92E, H93Y, H93D, H93Q, N94I, P95L, I101T, C105F, C105S, D107Y, L112V, H123Y, C124R, C124S, K125E, A126D, K128N, R130G, R130Q, R130L, G132D, I135V, I135K, C136R, C136F, K144Q, A151T, D153Y, D153N, Y155H, Y155C, R159K, R159S, R161K, R161I, G165R, G165E, S170N, S170I, R173C, Y174D, Y177C, H196Y, R234W, G251C, D252Y, F271S, D326G |
| <i>PTPN11</i>  | NM_002834    | G60V, G60R, G60A, D61Y, D61V, D61G, Y63C, E69K, E69G, E69D, E69Q, F71L, F71K, A72T, A72V, A72D, T73I, E76K, E76Q, E76M, E76A, E76G, E139G, E139D, N308D, N308T, N339S, P491L, S502P, S502A, S502L, G503V, G503G, G503A, G503E, Q506P, T507A, T507K                                                                                                                                                                                                |
| <i>RAD21</i>   | NM_006265    | Frameshift/nonsense/splice-site, R65Q, H208R, Q474R                                                                                                                                                                                                                                                                                                                                                                                               |
| <i>RUNX1</i>   | NM_001001890 | Frameshift/nonsense/splice-site, S73F, H78Q, H78L, R80C, R80P, R80H, L85Q, P86L, P86H, S114L, D133Y, L134P, R135G, R135K, R135S, R139Q, R142S, A165V, R174Q, R177L, R177Q, A224T, D171G, D171V, D171N, R205W, R223C                                                                                                                                                                                                                               |
| <i>SETBP1</i>  | NM_015559    | D868N, D868T, S869N, G870S, I871T, D880N, D880Q                                                                                                                                                                                                                                                                                                                                                                                                   |
| <i>SETD2</i>   | NM_014159    | Frameshift/nonsense, V1190M                                                                                                                                                                                                                                                                                                                                                                                                                       |
| <i>SETDB1</i>  | NM_001145415 | Frameshift/nonsense, K715E                                                                                                                                                                                                                                                                                                                                                                                                                        |
| <i>SF1</i>     | NM_004630    | Frameshift/nonsense/splice-site, T454M, Y476C, A508G                                                                                                                                                                                                                                                                                                                                                                                              |
| <i>SF3A1</i>   | NM_005877    | Frameshift/nonsense/splice-site, A57S, M117I, K166T, Y271C                                                                                                                                                                                                                                                                                                                                                                                        |

|              |              |                                                                                                                                                                                                                                                                                                                                                                                                                                                                                                                                                                                                                                                                                                                                                                                                                                                                                                                                                                                                                                                                                                                                                                                                                                                                                                                                                                                                                                                                                                                                                                                                                                                                                                                                                                                                                                                                                                                                                                                                                                                                                      |
|--------------|--------------|--------------------------------------------------------------------------------------------------------------------------------------------------------------------------------------------------------------------------------------------------------------------------------------------------------------------------------------------------------------------------------------------------------------------------------------------------------------------------------------------------------------------------------------------------------------------------------------------------------------------------------------------------------------------------------------------------------------------------------------------------------------------------------------------------------------------------------------------------------------------------------------------------------------------------------------------------------------------------------------------------------------------------------------------------------------------------------------------------------------------------------------------------------------------------------------------------------------------------------------------------------------------------------------------------------------------------------------------------------------------------------------------------------------------------------------------------------------------------------------------------------------------------------------------------------------------------------------------------------------------------------------------------------------------------------------------------------------------------------------------------------------------------------------------------------------------------------------------------------------------------------------------------------------------------------------------------------------------------------------------------------------------------------------------------------------------------------------|
| <i>SF3B1</i> | NM_012433    | G347V, R387W, R387Q, E592K, E622D, Y623C, R625L, R625C, R625G, H662Q, H662D, T663I, K666N, K666T, K666E, K666R, K700E, V701F, A708T, G740R, G740E, A744P, D781G, E783K, R831Q, L833F, E862K, R957Q                                                                                                                                                                                                                                                                                                                                                                                                                                                                                                                                                                                                                                                                                                                                                                                                                                                                                                                                                                                                                                                                                                                                                                                                                                                                                                                                                                                                                                                                                                                                                                                                                                                                                                                                                                                                                                                                                   |
| <i>SRSF2</i> | NM_003016    | Y44H, P95H, P95L, P95T, P95R, P95A, P107H, P95fs                                                                                                                                                                                                                                                                                                                                                                                                                                                                                                                                                                                                                                                                                                                                                                                                                                                                                                                                                                                                                                                                                                                                                                                                                                                                                                                                                                                                                                                                                                                                                                                                                                                                                                                                                                                                                                                                                                                                                                                                                                     |
| <i>SMC1A</i> | NM_006306    | K190T, R586W, M689V, R807H, R1090H, R1090C                                                                                                                                                                                                                                                                                                                                                                                                                                                                                                                                                                                                                                                                                                                                                                                                                                                                                                                                                                                                                                                                                                                                                                                                                                                                                                                                                                                                                                                                                                                                                                                                                                                                                                                                                                                                                                                                                                                                                                                                                                           |
| <i>SMC3</i>  | NM_005445    | Frameshift/nonsense, R155I, Q367E, D392V, K571R, R661P, G662C                                                                                                                                                                                                                                                                                                                                                                                                                                                                                                                                                                                                                                                                                                                                                                                                                                                                                                                                                                                                                                                                                                                                                                                                                                                                                                                                                                                                                                                                                                                                                                                                                                                                                                                                                                                                                                                                                                                                                                                                                        |
| <i>STAG1</i> | NM_005862    | Frameshift/nonsense/splice-site, H1085Y                                                                                                                                                                                                                                                                                                                                                                                                                                                                                                                                                                                                                                                                                                                                                                                                                                                                                                                                                                                                                                                                                                                                                                                                                                                                                                                                                                                                                                                                                                                                                                                                                                                                                                                                                                                                                                                                                                                                                                                                                                              |
| <i>STAG2</i> | NM_006603    | Frameshift/nonsense/splice-site                                                                                                                                                                                                                                                                                                                                                                                                                                                                                                                                                                                                                                                                                                                                                                                                                                                                                                                                                                                                                                                                                                                                                                                                                                                                                                                                                                                                                                                                                                                                                                                                                                                                                                                                                                                                                                                                                                                                                                                                                                                      |
| <i>SUZ12</i> | NM_015355    | Frameshift/nonsense                                                                                                                                                                                                                                                                                                                                                                                                                                                                                                                                                                                                                                                                                                                                                                                                                                                                                                                                                                                                                                                                                                                                                                                                                                                                                                                                                                                                                                                                                                                                                                                                                                                                                                                                                                                                                                                                                                                                                                                                                                                                  |
| <i>TET2</i>  | NM_001127208 | Frameshift/nonsense/splice-site, missense mutations in catalytic domains (p.1104-1481 and 1843-2002)                                                                                                                                                                                                                                                                                                                                                                                                                                                                                                                                                                                                                                                                                                                                                                                                                                                                                                                                                                                                                                                                                                                                                                                                                                                                                                                                                                                                                                                                                                                                                                                                                                                                                                                                                                                                                                                                                                                                                                                 |
| <i>TP53</i>  | NM_001126112 | Frameshift/nonsense/splice-site, S46F, G105C, G105R, G105D, G108S, G108C, R110L, R110C, T118A, T118R, T118I, S127F, S127Y, L130V, L130F, K132Q, K132E, K132W, K132R, K132M, K132N, F134V, F134L, F134S, C135W, C135S, C135F, C135G, C135Y, Q136K, Q136E, Q136P, Q136R, Q136L, Q136H, A138P, A138V, A138A, A138T, T140I, C141R, C141G, C141A, C141Y, C141S, C141F, C141W, V143M, V143A, V143E, L145Q, W146C, W146L, L145R, V147G, P151T, P151A, P151S, P151H, P151R, P152S, P152R, P152L, T155P, T155A, V157F, R158H, R158L, A159V, A159P, A159S, A159D, A161T, A161D, Y163N, Y163H, Y163D, Y163S, Y163C, K164E, K164M, K164N, K164P, H168Y, H168P, H168R, H168L, H168Q, M169I, M169T, M169V, E171K, E171Q, E171G, E171A, E171V, E171D, V172D, V173M, V173L, V173G, R174W, R175G, R175C, R175H, C176R, C176G, C176Y, C176F, C176S, P177R, P177R, P177L, H178D, H178P, H178Q, H179Y, H179R, H179Q, R181C, R181Y, D186G, G187S, P190L, P190T, H193N, H193P, H193L, H193R, L194F, L194R, I195F, I195N, I195T, R196P, V197L, G199V, Y205N, Y205C, Y205H, D208V, R213Q, R213P, R213L, R213Q, H214D, H214R, S215G, S215I, S215R, V216M, V217G, Y220N, Y220H, Y220S, Y220C, E224D, I232F, I232N, I232T, I232S, Y234N, Y234H, Y234S, Y234C, Y236N, Y236H, Y236C, M237V, M237K, M237I, C238R, C238G, C238Y, C238W, N239T, N239S, S241Y, S241C, S241F, C242G, C242Y, C242S, C242F, G244S, G244C, G244D, G245S, G245R, G245C, G245D, G245A, G245V, G245S, M246V, M246K, M246R, M246I, N247I, R248W, R248G, R248Q, R249G, R249W, R249T, R249M, P250L, I251N, L252P, I254S, I255F, I255N, I255S, L257Q, L257P, E258K, E258Q, D259Y, S261T, G262D, G262V, L265P, G266R, G266E, G266V, R267W, R267Q, R267P, E271K, V272M, V272L, R273S, R273G, R273C, R273H, R273P, R273L, V274F, V274D, V274A, V274G, V274L, C275Y, C275S, C275F, A276P, C277F, C277Y, P278T, P278A, P278S, P278H, P278R, P278L, G279E, R280G, R280K, R280T, R280I, R280S, D281N, D281H, D281Y, D281G, D281E, R282G, R282W, R282Q, R282P, E285K, E285V, E286G, E286V, E286K, K320N, L330R, G334V, R337C, R337L, A347T, L348F, T377P |
| <i>U2AF1</i> | NM_006758    | D14G, S34F, S34Y, R35L, R156H, R156Q, Q157R, Q157P                                                                                                                                                                                                                                                                                                                                                                                                                                                                                                                                                                                                                                                                                                                                                                                                                                                                                                                                                                                                                                                                                                                                                                                                                                                                                                                                                                                                                                                                                                                                                                                                                                                                                                                                                                                                                                                                                                                                                                                                                                   |
| <i>U2AF2</i> | NM_007279    | R18W, Q143L, M144I, L187V, Q190L                                                                                                                                                                                                                                                                                                                                                                                                                                                                                                                                                                                                                                                                                                                                                                                                                                                                                                                                                                                                                                                                                                                                                                                                                                                                                                                                                                                                                                                                                                                                                                                                                                                                                                                                                                                                                                                                                                                                                                                                                                                     |
| <i>WT1</i>   | NM_024426    | Frameshift/nonsense/splice-site                                                                                                                                                                                                                                                                                                                                                                                                                                                                                                                                                                                                                                                                                                                                                                                                                                                                                                                                                                                                                                                                                                                                                                                                                                                                                                                                                                                                                                                                                                                                                                                                                                                                                                                                                                                                                                                                                                                                                                                                                                                      |
| <i>ZRSR2</i> | NM_005089    | Frameshift/nonsense, R126P, E133G, C181F, H191Y, I202N, F239V, F239Y, N261Y, C280R, C302R, C326R, H330R, N382K                                                                                                                                                                                                                                                                                                                                                                                                                                                                                                                                                                                                                                                                                                                                                                                                                                                                                                                                                                                                                                                                                                                                                                                                                                                                                                                                                                                                                                                                                                                                                                                                                                                                                                                                                                                                                                                                                                                                                                       |

**Supplemental Table III. *International Classification of Diseases* codes used to ascertain prevalent type 2 diabetes mellitus, incident coronary artery disease, and myeloid dysplasia and neoplasia in the UK Biobank.**

| <b>Diagnosis</b>                | <b>ICD codes</b>                                                                                                                                                                                                                                                                                                                                                                            |
|---------------------------------|---------------------------------------------------------------------------------------------------------------------------------------------------------------------------------------------------------------------------------------------------------------------------------------------------------------------------------------------------------------------------------------------|
| Type 2 diabetes mellitus        | ICD 9: 2500, 25000, 25001, 25009, 25011, 25019, 2503, 2504, 2505, 25099<br>ICD 10: E10, E10.1, E10.2, E10.3, E10.4, E10.5, E10.6, E10.7, E10.8, E10.9, E11, E11.0, E11.1, E11.2, E11.3, E11.4, E11.5, E11.6, E11.7, E11.8, E11.9, E12, E12.1, E12.8, E12.9, E13, E13.1, E13.2, E13.3, E13.5, E13.6, E13.7, E13.8, E13.9, E14, E14.1, E14.2, E14.3, E14.4, E14.5, E14.6, E14.7, E14.8, E14.9 |
| Coronary artery disease         | ICD 9: 410, 4109, 411, 4119, 412, 4129, 4140, 4148, 4149<br>ICD 10: I21, I21.0, I21.1, I21.2, I21.3, I21.4, I21.9, I22, I22.0, I22.1, I22.8, I22.9, I23, I23.0, I23.1, I23.2, I23.3, I23.4, I23.5, I23.6, I23.8, I24, I24.0, I24.1, I24.8, I24.9, I25.1, I25.2, I25.5, I25.6, I25.8, I25.9                                                                                                  |
| Myeloid dysplasia and neoplasia | ICD 9: 2050, 2051, 2059<br>ICD 10: C92.0, C92.1, C92.3, C92.4, C92.5, C92.7, C92.9, D45, D46.9, D47.1, D47.3                                                                                                                                                                                                                                                                                |

**Supplemental Table IV. Case counts of CHIP in the UK Biobank and Women's Health Initiative study cohorts.**

|                          | <b>UK Biobank (N=11,495)</b> | <b>Women's Health Initiative (N=8,111)</b> |
|--------------------------|------------------------------|--------------------------------------------|
| Any CHIP                 | 415 (3.6%)                   | 698 (8.6%)                                 |
| CHIP with VAF $\leq$ 0.1 | 243 (2.1%)                   | 100 (1.2%)                                 |
| CHIP with VAF $>$ 0.1    | 172 (1.5%)                   | 598 (7.4%)                                 |
| <i>DNMT3A</i>            | 342 (3.0%)                   | 404 (5.0%)                                 |
| <i>TET2</i>              | 73 (0.6%)                    | 129 (1.6%)                                 |
| <i>ASXL1</i>             | --                           | 51 (0.6%)                                  |
| <i>JAK2</i>              | --                           | 26 (0.3%)                                  |
| Other CHIP driver        | --                           | 88 (1.1%)                                  |

CHIP = clonal hematopoiesis of indeterminate potential; VAF = variant allele frequency

**Supplemental Table V. Association of race/ethnicity with CHIP in the Women's Health Initiative cohort.**

| <b>Racial/ethnic group</b>     | <b>Number with CHIP</b> | <b>Adjusted odds ratio (95% CI)</b> | <b>P-value</b> |
|--------------------------------|-------------------------|-------------------------------------|----------------|
| White                          | 600 / 6,733 (8.9%)      | <i>Reference</i>                    | --             |
| Black                          | 66 / 918 (7.2%)         | 1.33 (0.41-4.31)                    | 0.64           |
| Hispanic/Latina                | 16 / 217 (7.4%)         | 1.13 (0.44-2.93)                    | 0.80           |
| Asian/Pacific Islander         | 8 / 157 (5.1%)          | 0.48 (0.007-31.03)                  | 0.73           |
| American Indian/Alaskan Native | 5 / 28 (17.9%)          | 2.56 (0.86-7.67)                    | 0.09           |
| Unknown                        | 3 / 58 (5.2%)           | 0.67 (0.20-2.22)                    | 0.51           |

Model is adjusted for age, PC 1-10, ever-smoking, diabetes mellitus, use of hormone therapy, enrollment in the WHI observational study vs. clinical trial, and randomization to hormone therapy vs. placebo. CHIP = clonal hematopoiesis of indeterminate potential.

**Supplemental Table VI. Association of premature menopause, premature menopause subtypes, and other reproductive factors with CHIP.**

|                                         | UK Biobank       |                    | Women's Health Initiative |                    |
|-----------------------------------------|------------------|--------------------|---------------------------|--------------------|
|                                         | All CHIP         | CHIP with VAF >0.1 | All CHIP                  | CHIP with VAF >0.1 |
|                                         | OR (95% CI)      | OR (95% CI)        | OR (95% CI)               | OR (95% CI)        |
| All premature menopause                 | 1.35 (0.83-2.17) | 2.07 (1.10-3.88)*  | 1.36 (1.07-1.73)*         | 1.32 (1.01-1.71)*  |
| Natural premature menopause             | 1.66 (0.86-3.18) | 2.72 (1.17-6.29)*  | 1.77 (1.18-2.63)**        | 1.75 (1.13-2.69)*  |
| Surgical premature menopause            | 1.11 (0.56-2.20) | 1.60 (0.65-3.98)   | 1.22 (0.92-1.62)          | 1.17 (0.86-1.60)   |
| • Bilateral oophorectomy ± hysterectomy | 1.23 (0.30-5.16) | 1.61 (0.22-11.91)  | 1.21 (0.87-1.65)          | 1.09 (0.75-1.55)   |
| • Hysterectomy only                     | 1.08 (0.50-2.34) | 1.60 (0.58-4.41)   | 1.27 (0.71-2.13)          | 1.41 (0.77-2.39)   |
| Age at menarche, per year               | 0.99 (0.93-1.06) | 0.99 (0.90-1.09)   | 0.97 (0.91-1.02)          | 0.97 (0.91-1.03)   |
| Age at menopause (continuous), per year | 0.99 (0.97-1.01) | 0.97 (0.94-0.99)*  | 0.99 (0.98-1.00)          | 0.99 (0.98-1.00)   |
| Duration of menopause, per year         | 1.01 (0.99-1.03) | 1.03 (1.002-1.06)* | 1.01 (0.998-1.02)         | 1.01 (0.995-1.02)  |
| Parity, per live birth                  | 0.96 (0.87-1.05) | 0.91 (0.80-1.05)   | 0.94 (0.89-1.00)          | 0.94 (0.88-1.00)   |
| Nulliparity                             | 1.11 (0.85-1.44) | 1.15 (0.77-1.72)   | 0.85 (0.44-1.48)          | 0.84 (0.41-1.53)   |

\*P<0.05, \*\*P<0.01

All models are adjusted for age at blood draw, the first 10 principal components of ancestry, current or former smoking, diabetes mellitus, and prior use of hormone therapy. WHI models are additionally adjusted for race/ethnicity, enrollment in the WHI observational study vs. clinical trials, and randomization to hormone therapy vs. placebo.

**Supplemental Table VII. Association of premature menopause with CHIP, further adjusted for body-mass index.**

|                              | UK Biobank         |                    | Women's Health Initiative |                    |
|------------------------------|--------------------|--------------------|---------------------------|--------------------|
|                              | All CHIP           | CHIP with VAF >0.1 | All CHIP                  | CHIP with VAF >0.1 |
|                              | <i>OR (95% CI)</i> | <i>OR (95% CI)</i> | <i>OR (95% CI)</i>        | <i>OR (95% CI)</i> |
| All premature menopause      | 1.39 (0.86-2.24)   | 2.09 (1.11-3.94)*  | 1.30 (1.02-1.66)*         | 1.26 (0.96-1.64)   |
| Natural premature menopause  | 1.70 (0.98-3.27)   | 2.76 (1.19-6.40)*  | 1.69 (1.13-2.54)*         | 1.73 (1.12-2.66)*  |
| Surgical premature menopause | 1.15 (0.58-2.28)   | 1.61 (0.65-4.02)   | 1.17 (0.88-1.56)          | 1.10 (0.80-1.51)   |

\*P<0.05

All models are adjusted for age at blood draw, the first 10 principal components of ancestry, current or former smoking, diabetes mellitus, prior use of hormone therapy, and body-mass index. WHI models are additionally adjusted for race/ethnicity, enrollment in the WHI observational study vs. clinical trials, and randomization to hormone therapy vs. placebo.

**Supplemental Table VIII. Sensitivity analyses: Associations between premature menopause and CHIP, excluding women with history of cancer, women with history of gynecologic surgery, and women enrolled in the Women’s Health Initiative hormone trial.**

|                                                                                                                                  | UK Biobank       |                    | Women’s Health Initiative |                    |
|----------------------------------------------------------------------------------------------------------------------------------|------------------|--------------------|---------------------------|--------------------|
|                                                                                                                                  | All CHIP         | CHIP with VAF >0.1 | All CHIP                  | CHIP with VAF >0.1 |
|                                                                                                                                  | OR (95% CI)      | OR (95% CI)        | OR (95% CI)               | OR (95% CI)        |
| <i>Excluding 1,308 women from UK Biobank and 625 women from WHI with a history of cancer or missing cancer history</i>           |                  |                    |                           |                    |
| All premature menopause                                                                                                          | 1.50 (0.90-2.50) | 2.26 (1.16-4.40)*  | 1.38 (1.07-1.78)*         | 1.35 (1.02-1.78)*  |
| Natural premature menopause                                                                                                      | 1.57 (0.76-3.26) | 2.60 (1.04-6.53)*  | 1.97 (1.30-2.88)***       | 1.96 (1.26-2.96)** |
| Surgical premature menopause                                                                                                     | 1.44 (0.73-2.87) | 2.00 (0.80-5.00)   | 1.19 (0.87-1.60)          | 1.14 (0.91-1.58)   |
| <i>Excluding 1,187 women from UK Biobank and 3,203 women from WHI with any history of hysterectomy or bilateral oophorectomy</i> |                  |                    |                           |                    |
| Natural premature menopause                                                                                                      | 1.85 (0.96-3.57) | 3.16 (1.35-7.36)** | 1.65 (0.93-2.94)          | 1.67 (0.90-3.10)   |
| <i>Excluding women in 2,649 women in WHI enrolled in the hormone therapy clinical trial</i>                                      |                  |                    |                           |                    |
| All premature menopause                                                                                                          | --               | --                 | 1.37 (1.02-1.83)*         | 1.30 (0.94-1.79)   |
| Natural premature menopause                                                                                                      | --               | --                 | 1.95 (1.19-3.07)**        | 1.79 (1.02-2.94)*  |
| Surgical premature menopause                                                                                                     | --               | --                 | 1.17 (0.81-1.64)          | 1.13 (0.76-1.64)   |

\*P<0.05, \*\*P<0.01, \*\*\*P<0.001

All models are adjusted for age at blood draw, the first 10 principal components of ancestry, current or former smoking, diabetes mellitus, and prior use of hormone therapy. WHI models are additionally adjusted for race/ethnicity, enrollment in the WHI observational study vs. clinical trials, and randomization to hormone therapy vs. placebo.



**Supplemental Table IX. Associations between premature menopause and CHIP in the Women’s Health Initiative, stratified by age at blood draw <70 years vs. ≥70 years.**

|                                                       | <b>All CHIP</b>    | <b>CHIP with VAF &gt;0.1</b> |
|-------------------------------------------------------|--------------------|------------------------------|
|                                                       | <i>OR (95% CI)</i> | <i>OR (95% CI)</i>           |
| <i>Women &lt;70 years old at blood draw (N=4,251)</i> |                    |                              |
| All premature menopause                               | 1.54 (1.09-2.13)*  | 1.50 (1.02-2.15)*            |
| Natural premature menopause                           | 1.92 (1.05-3.28)*  | 2.13 (1.14-3.71)*            |
| Surgical premature menopause                          | 1.41 (0.94-2.05)   | 1.29 (0.81-1.97)             |
| <i>Women ≥70 years old at blood draw (N=3,860)</i>    |                    |                              |
| All premature menopause                               | 1.23 (0.86-1.71)   | 1.16 (0.79-1.67)             |
| Natural premature menopause                           | 1.66 (0.91-2.84)   | 1.41 (0.70-2.58)             |
| Surgical premature menopause                          | 1.07 (0.70-1.60)   | 1.08 (0.68-1.65)             |

\*P<0.05

All models are adjusted for age at blood draw, race/ethnicity, the first 10 principal components of ancestry, current or former smoking, diabetes mellitus, prior use of hormone therapy, enrollment in the WHI observational study vs. clinical trials, and randomization to hormone therapy vs. placebo.

**Supplemental Table X. Association between premature menopause and specific CHIP mutations.**

|                              | <i>DNMT3A</i>       |                      |                           |                       | <i>TET2</i>         |                      |                           |                     | <i>ASXL1</i>              |                     |
|------------------------------|---------------------|----------------------|---------------------------|-----------------------|---------------------|----------------------|---------------------------|---------------------|---------------------------|---------------------|
|                              | UK Biobank          |                      | Women's Health Initiative |                       | UK Biobank          |                      | Women's Health Initiative |                     | Women's Health Initiative |                     |
|                              | All CHIP            | CHIP with VAF >0.1   | All CHIP                  | CHIP with VAF >0.1    | All CHIP            | CHIP with VAF >0.1   | All CHIP                  | CHIP with VAF >0.1  | All CHIP                  | CHIP with VAF >0.1  |
|                              | <i>OR (95% CI)</i>  | <i>OR (95% CI)</i>   | <i>OR (95% CI)</i>        | <i>OR (95% CI)</i>    | <i>OR (95% CI)</i>  | <i>OR (95% CI)</i>   | <i>OR (95% CI)</i>        | <i>OR (95% CI)</i>  | <i>OR (95% CI)</i>        | <i>OR (95% CI)</i>  |
| All premature menopause      | 1.38<br>(0.82-2.32) | 2.01<br>(0.96-4.19)  | 1.30<br>(0.94-1.75)       | 1.30<br>(0.91-1.81)   | 1.18<br>(0.37-3.82) | 2.12<br>(0.64-7.01)  | 1.38<br>(0.78-2.31)       | 1.32<br>(0.71-2.28) | 1.73<br>(0.74-3.59)       | 1.35<br>(0.51-3.03) |
| Natural premature menopause  | 1.83<br>(0.92-3.63) | 3.07<br>(1.22-7.69)* | 2.05<br>(1.25-3.20)**     | 2.08<br>(1.20-3.39)** | 0.89<br>(0.12-6.51) | 1.62<br>(0.22-11.98) | 1.33<br>(0.40-3.24)       | 1.09<br>(0.26-2.95) | 0.82<br>(0.46-3.89)       | 0.90<br>(0.50-4.24) |
| Surgical premature menopause | 1.05<br>(0.49-2.26) | 1.27<br>(0.40-4.08)  | 1.04<br>(0.69-1.50)       | 1.02<br>(0.65-1.54)   | 1.41<br>(0.34-5.87) | 2.52<br>(0.59-10.67) | 1.40<br>(0.72-2.49)       | 1.41<br>(0.70-2.56) | 2.06<br>(0.83-4.42)       | 1.50<br>(0.51-3.57) |

\*P<0.05, \*\*P<0.01

Models are adjusted for age, the first 10 principal components of ancestry, current or former smoking, diabetes mellitus, and prior use of hormone therapy. WHI models are additionally adjusted for race/ethnicity, enrollment in the WHI observational study vs. clinical trials, and randomization to hormone therapy vs. placebo.

**Supplemental Table XI. Laboratory values by CHIP and premature menopause status in the UK Biobank cohort (N=11,495).**

| <b>Laboratory value</b>                          | <b>Premature menopause and CHIP (n=19)</b> | <b>CHIP and no premature menopause (n=396)</b> | <b>Premature menopause and no CHIP (n=371)</b> | <b>No premature menopause or CHIP (n=10,709)</b> | <b>P-value</b> |
|--------------------------------------------------|--------------------------------------------|------------------------------------------------|------------------------------------------------|--------------------------------------------------|----------------|
| White blood cells (10 <sup>9</sup> cells/L)      | 6.85 (2.28)                                | 6.83 (1.78)                                    | 7.26 (1.90)                                    | 6.84 (2.18)                                      | 0.004          |
| Neutrophils (10 <sup>9</sup> cells/L)            | 4.17 (1.59)                                | 4.15 (1.41)                                    | 4.38 (1.47)                                    | 4.11 (1.32)                                      | 0.002          |
| Lymphocytes (10 <sup>9</sup> cells/L)            | 2.32 (0.83)                                | 2.04 (0.59)                                    | 2.18 (0.75)                                    | 2.08 (1.40)                                      | 0.40           |
| Monocytes (10 <sup>9</sup> cells/L)              | 0.41 (0.13)                                | 0.44 (0.16)                                    | 0.47 (0.16)                                    | 0.45 (0.20)                                      | 0.12           |
| Eosinophils (10 <sup>9</sup> cells/L)            | 0.16 (0.08)                                | 0.16 (0.15)                                    | 0.18 (0.15)                                    | 0.16 (0.13)                                      | 0.12           |
| Basophils (10 <sup>9</sup> cells/L)              | 0.03 (0.02)                                | 0.04 (0.05)                                    | 0.04 (0.06)                                    | 0.04 (0.06)                                      | 0.82           |
| Hemoglobin (g/dL)                                | 13.8 (1.2)                                 | 13.7 (0.9)                                     | 13.6 (1.0)                                     | 13.7 (0.9)                                       | 0.57           |
| Hematocrit (%)                                   | 40.6 (3.5)                                 | 40.0 (2.8)                                     | 39.9 (2.9)                                     | 40.0 (2.7)                                       | 0.57           |
| Mean corpuscular volume (fL)                     | 91.5 (5.6)                                 | 91.9 (4.5)                                     | 91.6 (4.3)                                     | 92.0 (4.0)                                       | 0.26           |
| Mean corpuscular hemoglobin concentration (g/dL) | 34.1 (0.8)                                 | 34.3 (1.1)                                     | 34.2 (0.8)                                     | 34.2 (0.9)                                       | 0.22           |
| Red blood cell distribution width (%)            | 13.9 (1.3)                                 | 13.5 (0.9)                                     | 13.6 (1.2)                                     | 13.5 (0.9)                                       | <0.001         |
| Platelets (10 <sup>9</sup> cells/L)              | 242.5 (61.1)                               | 254.2 (59.6)                                   | 261.9 (60.7)                                   | 252.7 (56.0)                                     | 0.02           |
| C-reactive protein, mg/L (median [IQR])          | 1.84 [0.82, 2.97]                          | 1.43 [0.76, 2.80]                              | 2.10 [0.93, 4.14]                              | 1.34 [0.66, 2.81]                                | <0.001         |

Values are displayed as mean (SD) unless otherwise specified. P-values were calculated using analysis of variance (for normally distributed variables) or the Kruskal-Wallis test (for non-normally distributed variables).

**Supplemental Table XII. Association of premature menopause with mosaic chromosomal alterations in the UK Biobank.**

|                                  | <b>Any mosaicism*</b> |         | <b>Mosaicism with cell fraction &gt;0.1</b> |         |
|----------------------------------|-----------------------|---------|---------------------------------------------|---------|
|                                  | OR (95% CI)           | P-value | OR (95% CI)                                 | P-value |
| <i>All chromosomal mosaicism</i> |                       |         |                                             |         |
| All premature menopause          | 1.09<br>(0.99-1.19)   | 0.07    | 1.31<br>(1.01-1.70)                         | 0.04    |
| Natural premature menopause      | 1.13<br>(0.98-1.29)   | 0.08    | 1.28<br>(0.86-1.89)                         | 0.22    |
| Surgical premature menopause     | 1.06<br>(0.94-1.19)   | 0.36    | 1.34<br>(0.96-1.87)                         | 0.09    |
| <i>Autosomes only</i>            |                       |         |                                             |         |
| All premature menopause          | 1.10<br>(0.95-1.26)   | 0.21    | 1.15<br>(0.85-1.56)                         | 0.36    |
| Natural premature menopause      | 1.14<br>(0.93-1.40)   | 0.21    | 1.03<br>(0.64-1.67)                         | 0.90    |
| Surgical premature menopause     | 1.06<br>(0.88-1.28)   | 0.54    | 1.25<br>(0.85-1.83)                         | 0.27    |
| <i>Chromosome X only</i>         |                       |         |                                             |         |
| All premature menopause          | 1.07<br>(0.96-1.20)   | 0.20    | 1.76<br>(1.09-2.86)                         | 0.02    |
| Natural premature menopause      | 1.11<br>(0.95-1.31)   | 0.19    | 2.07<br>(1.06-4.04)                         | 0.03    |
| Surgical premature menopause     | 1.04<br>(0.90-1.21)   | 0.56    | 1.53<br>(0.78-3.00)                         | 0.21    |

Models are adjusted for age, race/ethnicity, the first 10 principal components of ancestry, current or former smoking, diabetes mellitus, and prior use of hormone therapy.

\*Mosaic chromosomal alterations were detectable at cell fractions as low as 1%.

**Supplemental Table XIII. Association between use of hormone therapy before study enrollment and CHIP, stratified by age at menopause.**

|                                                    | Age at menopause              |                               |                               |                               |                               | <i>P</i> (trend) <sup>+</sup> |
|----------------------------------------------------|-------------------------------|-------------------------------|-------------------------------|-------------------------------|-------------------------------|-------------------------------|
|                                                    | <40 years                     | 40-44 years                   | 45-49 years                   | 50-54 years                   | ≥55 years                     |                               |
|                                                    | <i>OR</i> (95%<br><i>CI</i> ) |                               |
| <i>UK Biobank</i>                                  |                               |                               |                               |                               |                               |                               |
| Ever-use of hormone therapy at study enrollment    | 0.63<br>(0.22-1.76)           | 1.14<br>(0.56-2.32)           | 1.21<br>(0.77-1.91)           | 1.27<br>(0.96-1.70)           | 1.71<br>(1.01-2.89)*          | <0.001                        |
| Current use of hormone therapy at study enrollment | 0.94<br>(0.18-4.79)           | 1.60<br>(0.53-4.86)           | 1.69<br>(0.76-3.79)           | 1.91<br>(1.18-3.09)**         | 2.94<br>(1.39-6.21)**         | <0.001                        |
| <i>Women's Health Initiative</i>                   |                               |                               |                               |                               |                               |                               |
| Ever-use of hormone therapy at study enrollment    | 1.33<br>(0.76-2.47)           | 1.21<br>(0.72-2.10)           | 0.91<br>(0.64-1.30)           | 1.06<br>(0.80-1.39)           | 1.22<br>(0.82-1.84)           | 0.67                          |
| Current use of hormone therapy at study enrollment | 0.75<br>(0.45-1.22)           | 1.09<br>(0.66-1.78)           | 0.87<br>(0.59-1.27)           | 1.19<br>(0.86-1.63)           | 1.10<br>(0.71-1.68)           | 0.41                          |

\**P*<0.05, \*\**P*<0.01

<sup>+</sup>*P*-value for trend calculated using the Mantel-Haenszel chi-squared test of trend

All models are adjusted for age at blood draw, the first 10 principal components, current or former smoking, and diabetes mellitus. WHI models are additionally adjusted for race/ethnicity, enrollment in the WHI observational study vs. clinical trials, and randomization to hormone therapy vs. placebo.

**Supplemental Table XIV. Association of CHIP with incident coronary artery disease.**

|                                                                        | <b>Number of women without prevalent CAD</b> | <b>Events / woman-years at risk</b> | <b>Adjusted hazard ratio (95% CI)</b> | <b>P-value</b> |
|------------------------------------------------------------------------|----------------------------------------------|-------------------------------------|---------------------------------------|----------------|
| <i>UK Biobank</i>                                                      |                                              |                                     |                                       |                |
| No CHIP                                                                | 10,792                                       | 448 / 108,757                       | <i>Reference</i>                      | --             |
| All CHIP                                                               | 403                                          | 25 / 4,002                          | 1.31 (0.87-1.99)                      | 0.20           |
| CHIP with VAF ≤0.1                                                     | 236                                          | 13 / 2,370                          | 1.13 (0.64-2.02)                      | 0.67           |
| CHIP with VAF >0.1                                                     | 167                                          | 12 / 1,633                          | 1.56 (0.88-2.78)                      | 0.13           |
| <i>Women's Health Initiative (overall)</i>                             |                                              |                                     |                                       |                |
| No CHIP                                                                | 6,640                                        | 1,036 / 84,007                      | <i>Reference</i>                      | --             |
| All CHIP                                                               | 616                                          | 110 / 7,173                         | 1.19 (0.97-1.45)                      | 0.10           |
| CHIP with VAF ≤0.1                                                     | 84                                           | 13 / 985                            | 1.15 (0.66-1.99)                      | 0.62           |
| CHIP with VAF >0.1                                                     | 532                                          | 97 / 6,188                          | 1.19 (0.96-1.48)                      | 0.11           |
| <i>Women's Health Initiative, women &lt;70 years old at blood draw</i> |                                              |                                     |                                       |                |
| No CHIP                                                                | 3,637                                        | 510 / 51,541                        | <i>Reference</i>                      | --             |
| All CHIP                                                               | 256                                          | 50 / 3,521                          | 1.38 (1.03-1.86)                      | 0.03           |
| CHIP with VAF ≤0.1                                                     | 37                                           | 4 / 495                             | 0.89 (0.33-2.39)                      | 0.82           |
| CHIP with VAF >0.1                                                     | 219                                          | 36 / 3,026                          | 1.45 (1.07-1.98)                      | 0.02           |
| <i>Women's Health Initiative, women ≥70 years old at blood draw</i>    |                                              |                                     |                                       |                |
| No CHIP                                                                | 3,003                                        | 526 / 32,467                        | <i>Reference</i>                      | --             |
| All CHIP                                                               | 360                                          | 60 / 3,652                          | 1.07 (0.81-1.41)                      | 0.65           |
| CHIP with VAF ≤0.1                                                     | 47                                           | 9 / 491                             | 1.32 (0.68-2.56)                      | 0.41           |
| CHIP with VAF >0.1                                                     | 313                                          | 51 / 3,162                          | 1.03 (0.76-1.39)                      | 0.85           |

Cox proportional hazard models are adjusted for age, the first 10 principal components of ancestry, current or former tobacco use, prevalent diabetes mellitus, systolic blood pressure, antihypertensive medication use, cholesterol-lowering medication use, body-mass index, prior hysterectomy, and a history of prior hormone therapy use; WHI models are further adjusted for race/ethnicity, enrollment in the WHI observational study vs. clinical trial, whether women were randomized to hormone therapy vs. placebo, and an inverse probability weight to account for the non-random selection of women for whole-genome sequencing in WHI.
